# Supplementary material for: Attenuating Effects of Dieckol on Endothelial Cell Dysfunction via Modulation of Th17/Treg Balance in the Intestine and Aorta of Spontaneously Hypertensive Rats
Source: PubMed Central journal article supplement (PMC7920082; doi:10.3390/antiox10020298), 2021-02-16
Supplement: antioxidants-10-00298-s001.pdf [file antioxidants-10-00298-s001.pdf]

**Table S1. List of primers for qRT-PCR**

| <b>Gene</b>    |         | <b>Primers</b>                | <b>Accession number</b>     |
|----------------|---------|-------------------------------|-----------------------------|
| $\beta$ -actin | Forward | 5'-CCGTAAAGACCTCTATGCCAAC-3'  | [Genebank : NM_031144.3]    |
|                | Reverse | 5'-GGCAGTAATCTCCTTCTGCATC-3'  |                             |
| ROR $\gamma$ t | Forward | 5'-TCCAAGAAAAGAGGAGAGTGG-3'   | [Genebank : XM_017591313.2] |
|                | Reverse | 5'-GTCGATGAGTCTTGCAGAGATG-3'  |                             |
| Foxp3          | Forward | 5'-CTACAGTGCCCCCTAGTCATGGT-3' | [Genebank : NM_001108250.1] |
|                | Reverse | 5'-TGCATAAAGTGTGGTCTGTCCT-3'  |                             |
| SGK1           | Forward | 5'-AGTTTTGCAGAAGAAAGCCATC-3'  | [Genebank : NM_001193568.1] |
|                | Reverse | 5'-GAAAGGGTGCTTCACATTCTTC-3'  |                             |
| ACT1           | Forward | 5'-TGAAGTGTGTAAGTTCCTGCT-3'   | [Genebank : NM_001044248.1] |
|                | Reverse | 5'-TATCAATACCCCGGATTCTGTC-3'  |                             |
| TRAF6          | Forward | 5'-AGATGGAAGCACAGCAGTGTA-3'   | [Genebank : NM_001107754.2] |
|                | Reverse | 5'-CCTCTTCTGGGATTTCAAGTG-3'   |                             |
| NF- $\kappa$ B | Forward | 5'-CGGATTTGGAAACTAGTGAACC-3'  | [Genebank : NM_001276711.1] |
|                | Reverse | 5'-CTTCTGGCGTTTCCTCTGACT-3'   |                             |
| C/EBP $\beta$  | Forward | 5'-ACTTCAGCCCCTACCTGGAG-3'    | [Genebank : NM_001301715.1] |
|                | Reverse | 5'-GAAGAGGTCCGAAAGGAAGTC-3'   |                             |
| C/EBP $\delta$ | Forward | 5'-GACTTCAGCGCCTACATTGATT-3'  | [Genebank : NM_013154.2]    |
|                | Reverse | 5'-TTGTGATTGCTGTTGAAGAGGT-3'  |                             |
| IL-6           | Forward | 5'-ATGTTCTCAGGAGATCTTGGA-3'   | [Genebank : NM_02589.2]     |
|                | Reverse | 5'-GCATCATCGCTGTTTCATACAAT-3' |                             |
| Occludin       | Forward | 5'-CCCAGGCTTCTGGATCTATGTA-3'  | [Genebank : NM_031329.3]    |
|                | Reverse | 5'-ACCAGTGCCTCCAGGAGTATAA-3'  |                             |

**Table S2. List of antibodies for DAB staining**

| <b>Antigen (host)</b> | <b>Company</b> | <b>Cat. No</b> | <b>Dilution rate</b> |
|-----------------------|----------------|----------------|----------------------|
| IL-17A (rabbit)       | Santa cruz     | sc-374218      | 1:100                |
| IL-10 (mouse)         | Santa cruz     | sc-8438        | 1:100                |
| Zo-1 (rabbit)         | Bioss          | BS-1329R       | 1:250                |
| peNOS (rabbit)        | Santa cruz     | sc-136519      | 1:50                 |
| eNOS (rabbit)         | Invitrogen     | PA3-031A       | 1:250                |

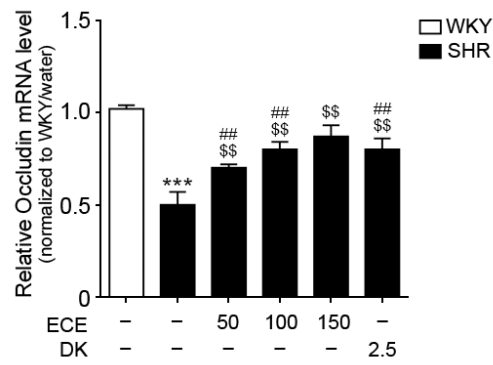

**Figure S1. Regulatory effects of DK and ECE on the destruction of gut barrier junction in the intestine of SHR.** (A, B) Occludin expression level in intestinal tissue was decreased by SHR/water and increased by ECE or DK treatment. N=5 for each of the 6 groups. \*\*\*,  $p < 0.001$ , vs. WKY/water; \$\$,  $p < 0.01$ , vs. SHR/water; ##,  $p < 0.01$ , vs. SHR/ECE150 (Mann Whitney U test). ECE, *Ecklonia cava* extract; DK, diekol; WKY, wistar Kyoto; SHR, spontaneously hypertensive rat.

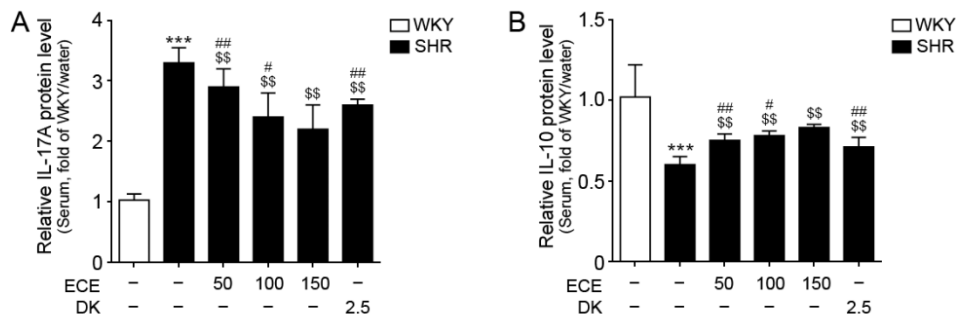

**Figure S2. Regulatory effects of DK and ECE on IL-17A and Il-10 expression level in the serum of SHR.** (A) In the serum, IL-17A expression levels were increased by SHR/water. Addition of ECE and DK decreased the IL-17A level. (B) IL-10 expression serum levels were decreased by SHR/water. Addition of ECE and DK increased the IL-10 level. N=5 for each of the 6 groups. \*\*\*,  $p < 0.001$ , vs. WKY/water; \$\$,  $p < 0.01$ , vs. SHR/water; #,  $p < 0.05$  and ##,  $p < 0.01$ , vs. SHR/ECE150 (Mann Whitney U test). IL-17A, interleukin-17A; IL-10, interleukin-10; ECE, *Ecklonia cava* extract; DK, diekol; WKY, wistar Kyoto; SHR, spontaneously hypertensive rat.

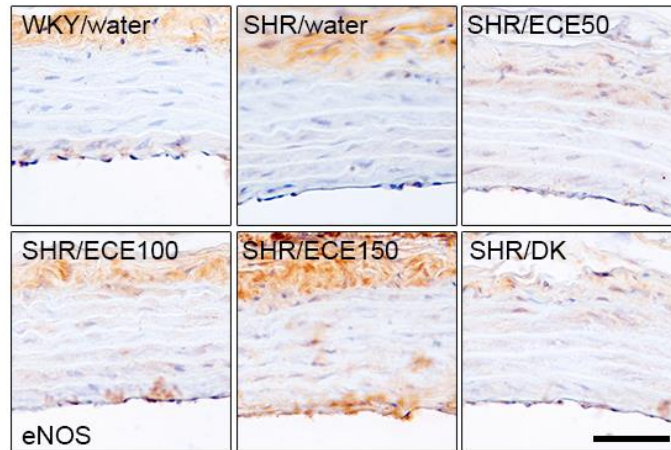

**Figure S3. Regulatory effects of DK and ECE on eNOS expression level in the aorta of SHR.** In the aorta, eNOS expression levels were decreased by SHR/water. Addition of ECE and DK decreased the eNOS level. N=5 for each of the 6 groups. Scale bar = 100  $\mu$ m. ECE, *Ecklonia cava* extract; DK, diekol; WKY, wistar Kyoto; SHR, spontaneously hypertensive rat.
